# Supplementary material
Source: PubMed Central journal article supplement (PMC3397279)

Table e1. Analytical Fit to Radial Dose Distributions. Radial dose distributions were fit piecewise using a cubic polynomial to represent the inner cupped portion of dose deposition and a power function to describe the dose tails extending radially outward. Function coefficients and goodness of fit are shown.

### Analytical Fit to Radial Dose Distributions

| Collimation width (cm) | Central Fit: $f(x)=p_1x^3+p_2x^2+p_3x+p_4$ |           |           |          |                | Tail Fit: $f(x)=ax^b$ |       |                |
|------------------------|--------------------------------------------|-----------|-----------|----------|----------------|-----------------------|-------|----------------|
|                        | p1                                         | p2        | p3        | p4       | r <sup>2</sup> | a                     | b     | r <sup>2</sup> |
| 1                      | -5.83E-09                                  | 4.61E-09  | -1.18E-09 | 3.38E-09 | 1.000          | 1.30E-09              | -1.18 | 0.979          |
| 2                      | -3.32E-10                                  | 5.67E-10  | -2.84E-10 | 1.69E-09 | 0.733          | 1.53E-09              | -1.28 | 0.944          |
| 3                      | -4.80E-12                                  | 8.05E-12  | 1.21E-11  | 1.10E-09 | 0.688          | 1.82E-09              | -1.36 | 0.900          |
| 4                      | -9.44E-13                                  | 6.96E-12  | 4.40E-13  | 8.27E-10 | 0.703          | 2.24E-09              | -1.45 | 0.837          |
| 5                      | -1.34E-12                                  | 1.05E-11  | -5.66E-12 | 6.64E-10 | 0.840          | 2.80E-09              | -1.53 | 0.775          |
| 6                      | -8.14E-13                                  | 9.83E-12  | -8.91E-12 | 5.57E-10 | 0.929          | 3.61E-09              | -1.64 | 0.701          |
| 7                      | 1.29E-12                                   | -3.24E-12 | 1.30E-11  | 4.68E-10 | 0.988          | 4.86E-09              | -1.76 | 0.626          |
| 8                      | 6.31E-13                                   | -6.60E-13 | 1.01E-11  | 4.08E-10 | 0.991          | 6.51E-09              | -1.87 | 0.581          |
| 9                      | 1.13E-13                                   | 2.75E-12  | 1.97E-12  | 3.67E-10 | 0.996          | 9.36E-09              | -2.02 | 0.561          |
| 10                     | 1.05E-13                                   | 3.06E-12  | -9.88E-13 | 3.33E-10 | 0.996          | 1.58E-08              | -2.25 | 0.550          |
| 11                     | 2.09E-13                                   | 1.94E-12  | 1.04E-12  | 3.02E-10 | 0.998          | 3.62E-08              | -2.63 | 0.556          |
| 12                     | 2.15E-13                                   | 1.73E-12  | 9.37E-13  | 2.77E-10 | 0.998          | 1.06E-07              | -3.12 | 0.662          |
| 13                     | 3.36E-13                                   | 3.88E-13  | 3.90E-12  | 2.54E-10 | 0.998          | 7.80E-07              | -4.07 | 0.850          |
| 14                     | 4.08E-13                                   | -3.73E-13 | 4.95E-12  | 2.36E-10 | 0.996          |                       |       |                |

Figure e1. Simulation Geometry. Two dimensional dose profiles of primary and scattered photon interactions were generated by rotating an x-ray source around a cylinder with a voxelized central disk (0.1 cm isotropic voxels) (a). Three dimensional distributions used a fully voxelized cylinder (0.5 cm isotropic voxels) (b).

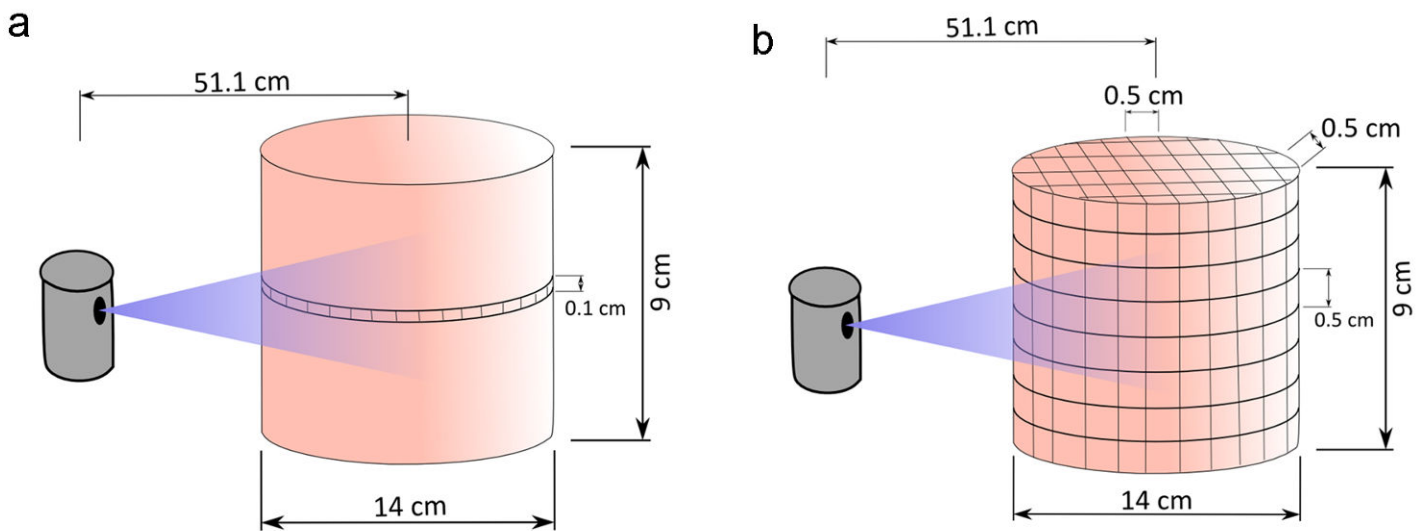

Figure e2. Simulated Photon Spectrum. The spectrum of a 320 kVp x-ray beam filtered by 4 mm of copper was simulated using MCNPX.

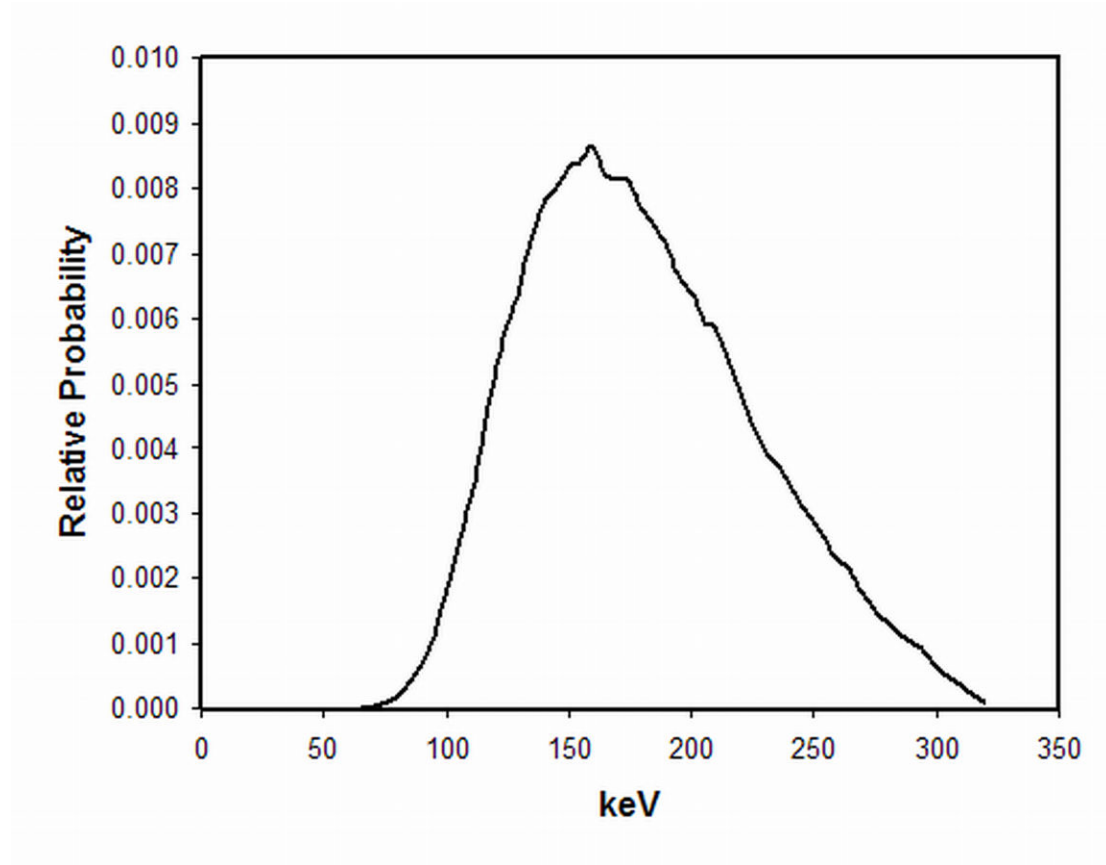

Figure e3. Depth Dose Curve. The simulated depth dose profile of 178 keV monoenergetic x-rays closely matched that of 320 kVp x-rays filtered by 4 mm of copper.

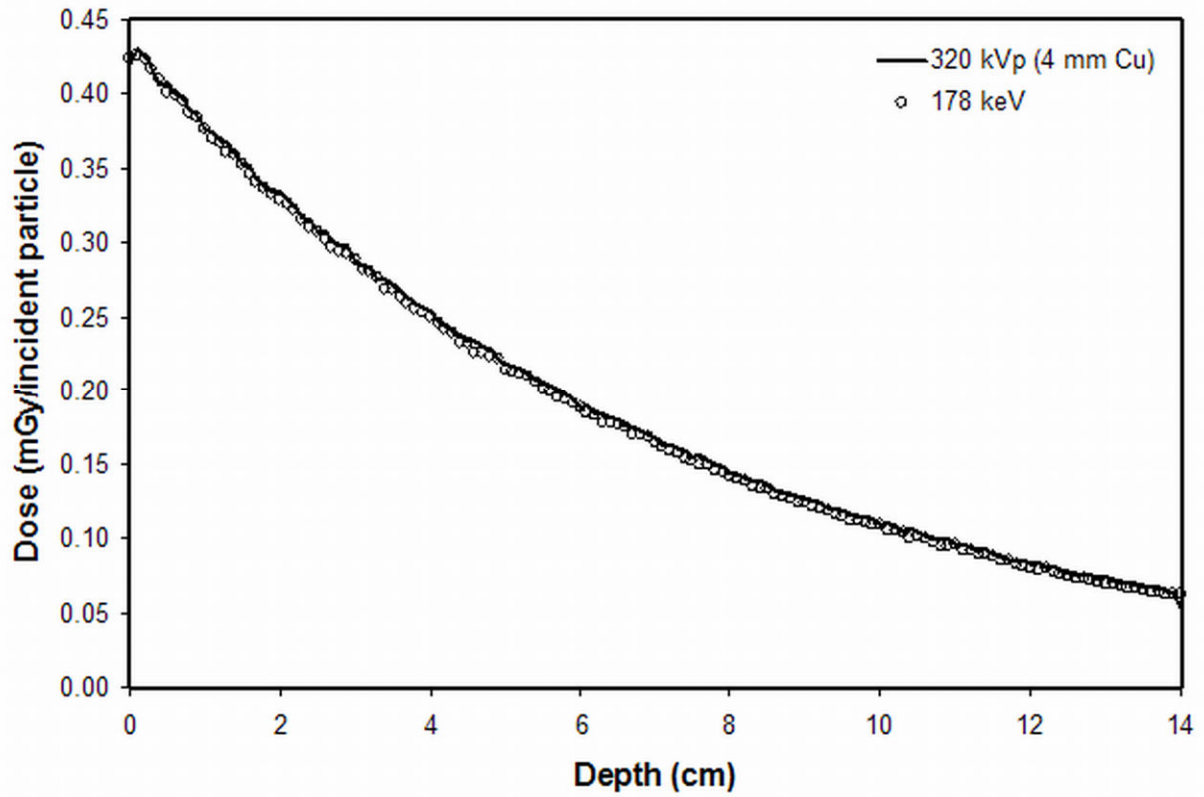

Figure e4. Z-Direction Scatter Tails. Z-direction dose profiles from primary and scattered x-rays are shown for 2 cm z-collimation and three different x-y collimation widths (2, 7, and 14 cm). For all x-y collimation widths, scatter tails decreased towards the cylinder top/bottom to no more than 5% of maximum dose deposition. Error bars represent the standard deviation in dose deposition from primary x-rays across the beam field of view.

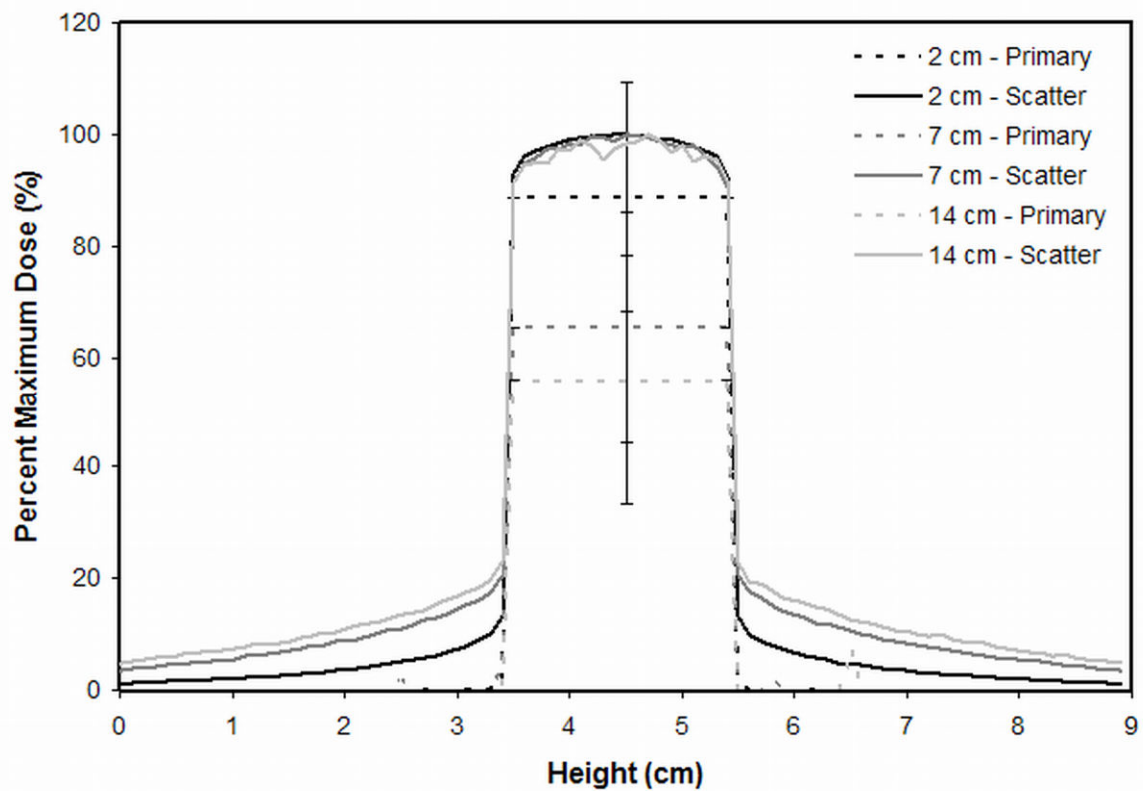

Supplement: NIHMS366322-supplement-01.pdf [file NIHMS366322-supplement-01.pdf]
